# Supplementary material
Source: Springer Nature journal article supplement (https://www.springermedizin.de/resource/supplementary/12902_2014_252_MOESM4_ESM.pdf/9515878)

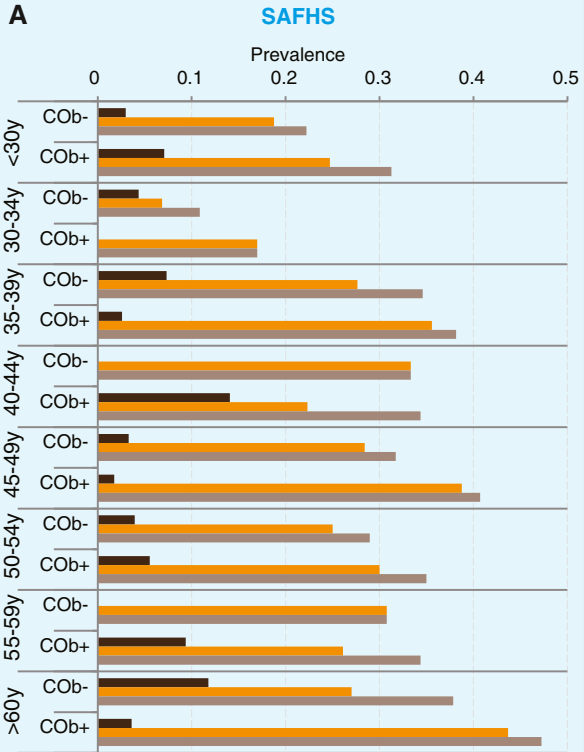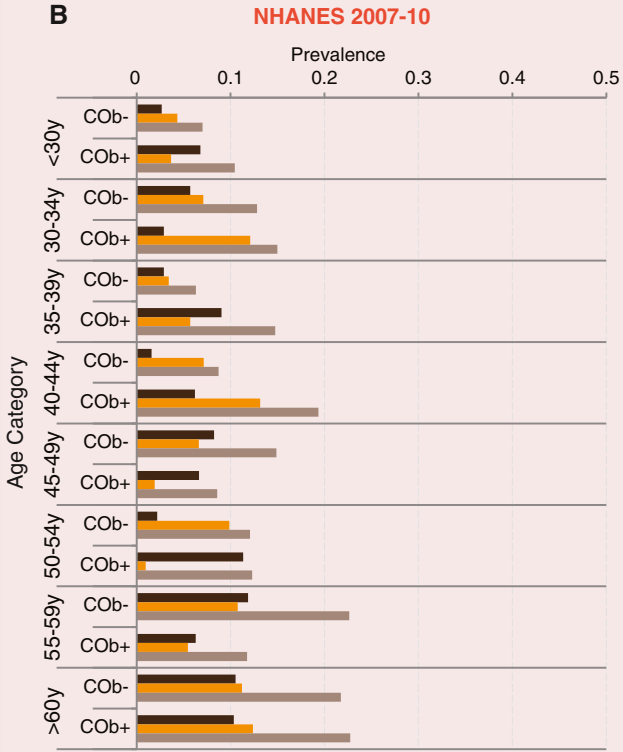

Clinical Hypothyroidism
  Subclinical Hypothyroidism
  Hypothyroidism

Supplement: MOESM4 [file 9515878]
